# Supplementary material
Source: publisher figshare collection journal article supplement (https://frontiersin.figshare.com/ndownloader/files/31311910)
Supplement: Supplementary file 1 [file 31311910]

## Sheet: Prediction strength and node se
	实际强度			节点11预测		相对误差/%				RMSE			10			相对误差			9			相对误差			12			误差			4			误差
3d	7d	28d	3	7	28
0.184	0.272	0.254	0.184072	0.271676	0.266955	0.0389438	0.1192	5.10047	0.0352172	0.116106	0.284878	0.183997	0.266479	0.267812	0.00187298	2.02961	5.43792	0.183829	0.267667	0.277319	0.0930034	1.59287	9.18082	0.183873	0.264193	0.269018	0.0689083	2.87034	5.91277	0.175808	0.258852	0.282217	4.45208	4.83391	11.1092
0.161	0.27	0.31	0.160392	0.271525	0.304933	0.377489	0.564856	1.63453				0.160588	0.277359	0.285752	0.256036	2.72557	7.82201	0.161329	0.275199	0.278008	0.204272	1.92559	10.3201	0.161165	0.27648	0.304165	0.102523	2.40016	1.88239	0.167802	0.287369	0.331289	4.22508	6.4328	6.86756
0.188	0.361	0.35	0.188221	0.360484	0.350406	0.117728	0.143045	0.115964				0.188059	0.360136	0.351772	0.0315135	0.239429	0.506174	0.187904	0.360479	0.35232	0.0511628	0.144283	0.66288	0.188003	0.360055	0.350544	0.00162636	0.261897	0.155543	0.190327	0.326202	0.362445	1.23791	9.63923	3.55566
0.175	0.245	0.261	0.174891	0.251718	0.261637	0.0620874	2.74205	0.243983				0.174979	0.25034	0.263659	0.011875	2.17976	1.01889	0.174988	0.249721	0.262368	0.0067177	1.92683	0.524306	0.174974	0.250545	0.266941	0.0149041	2.26337	2.27628	0.174171	0.270246	0.27189	0.473692	10.3043	4.1723
0.147	0.369	0.448	0.149429	0.368958	0.448361	1.65233	0.0113186	0.0804943				0.14943	0.36825	0.451007	1.65338	0.203305	0.671187	0.149413	0.368738	0.448802	1.64176	0.0710199	0.179081	0.149218	0.369002	0.448221	1.50872	0.000615892	0.0493011	0.163066	0.356585	0.439253	10.9296	3.36455	1.95254
0.173	0.396	0.604	0.173031	0.396149	0.604181	0.0178431	0.0377143	0.0300444				0.173041	0.39588	0.603153	0.0238594	0.0304131	0.140285	0.173042	0.3958	0.603873	0.0240008	0.0505854	0.0210375	0.173014	0.395953	0.603686	0.00830389	0.0119563	0.0520415	0.170944	0.410656	0.4956	1.18819	3.70108	17.947
0.193	0.345	0.411	0.19302	0.345267	0.411082	0.0102853	0.0774502	0.0199524				0.192992	0.345041	0.410203	0.00422395	0.0119691	0.194001	0.192976	0.345232	0.410371	0.0125839	0.0673698	0.152935	0.19303	0.344788	0.410156	0.015764	0.0614877	0.205302	0.193197	0.358815	0.332463	0.102327	4.00445	19.1088
0.343	0.621	0.796	0.343121	0.621032	0.796219	0.0352445	0.00507847	0.0275517				0.342898	0.62126	0.796092	0.0296011	0.0418674	0.0116124	0.343155	0.620921	0.796645	0.0453341	0.0127744	0.0809768	0.342975	0.621214	0.796395	0.00718328	0.0344256	0.0495728	0.341635	0.628889	0.806696	0.397929	1.27038	1.34368
0.368	0.764	0.626	0.365257	0.764429	0.626038	0.745279	0.0560969	0.00613058				0.365695	0.764337	0.625577	0.626378	0.0441013	0.0675726	0.365982	0.764145	0.625956	0.548261	0.0189741	0.00702246	0.366431	0.764067	0.626017	0.426276	0.00873699	0.00272538	0.362318	0.767535	0.629387	1.54405	0.462645	0.54111
0.324	0.583	0.704	0.324107	0.583084	0.704275	0.0331378	0.0143453	0.0391028				0.324048	0.583116	0.704813	0.0148302	0.0198785	0.11553	0.323962	0.583248	0.703704	0.0117231	0.0425848	0.042056	0.323967	0.583271	0.703958	0.0103011	0.0465254	0.00594676	0.321127	0.585946	0.775252	0.886672	0.505281	10.121
0.276	0.571	0.433	0.276281	0.571502	0.433244	0.10182	0.0879116	0.0564649				0.27604	0.570963	0.433276	0.0145186	0.0064603	0.0638498	0.276012	0.570979	0.433282	0.00447526	0.00363707	0.0651874	0.275994	0.571157	0.433367	0.0021742	0.0274617	0.0847382	0.278151	0.562162	0.465982	0.779206	1.54786	7.61707
0.365	0.971	1.723	0.364653	0.968911	1.71512	0.0950492	0.215088	0.457157				0.367971	0.965551	1.71082	0.814018	0.561221	0.706711	0.367946	0.966154	1.71109	0.807227	0.499098	0.691352	0.365305	0.965733	1.71194	0.0834551	0.542386	0.641664	0.368	0.95802	1.64015	0.821869	1.33677	4.8085
0.348	0.601	0.616	0.363147	0.385663	0.286349	4.3526	35.8298	53.5148				0.189698	0.503527	0.512194	45.4892	16.2185	16.8515	0.156188	0.938248	0.293585	55.1185	56.1145	52.3402	0.350625	0.659371	0.27157	0.754411	9.71234	55.914	0.340687	0.666991	0.533743	2.10149	10.9802	13.3533
0.317	0.643	0.697	0.362841	0.674051	0.39525	14.4609	4.82908	43.2926				0.355763	0.882237	1.25526	12.2281	37.2064	80.0948	0.178302	0.91399	0.280061	43.7534	42.1447	59.819	0.365428	0.949367	1.48261	15.277	47.6465	112.713	0.367999	0.952198	1.60639	16.0881	48.0868	130.471
0.454	0.809	0.839	0.337912	0.592709	0.564493	25.5701	26.7356	32.7184				0.36794	0.807758	1.40567	18.956	0.153558	67.5412	0.355005	0.696934	1.06347	21.805	13.8524	26.7549	0.366023	0.886571	0.837314	19.3783	9.58852	0.20096	0.367969	0.920985	1.21187	18.9495	13.8424	44.4427
0.406	0.582	0.574	0.342576	0.930597	1.58551	15.6216	59.8965	176.222				0.367996	0.966746	1.71445	9.36067	66.1076	198.686	0.350084	0.783868	1.05708	13.7724	34.6852	84.1603	0.36712	0.966363	1.69954	9.57624	66.0417	196.087	0.368	0.959328	1.64537	9.35964	64.833	186.649
						3.95578	8.21031	19.5974							5.59476	7.98622	23.7456				8.61874	9.57202	15.3126				2.95226	8.8449	23.5146				4.59609	11.5716	29.0038
						0.0102853	0.00507847	0.00613058
						25.5701	59.8965	176.222
				8			相对误差						7			误差			6			误差			5			误差			3			误差
			0.183783	0.271282	0.28932	0.117871	0.263976	13.9056				0.183628	0.256727	0.293161	0.20222	5.6152	15.4178	0.178461	0.283103	0.28128	3.01057	4.08194	10.7403	0.18485	0.272261	0.264462	0.462074	0.0961079	4.11892	0.169841	0.305226	0.343234	7.6952	12.2154	35.1315
			0.161143	0.267377	0.299434	0.0886327	0.971487	3.40831				0.162812	0.272817	0.324099	1.1256	1.04323	4.54803	0.167189	0.274616	0.289615	3.84412	1.70972	6.57577	0.158212	0.287318	0.304212	1.73162	6.41396	1.86712	0.172682	0.309057	0.348406	7.25568	14.4657	12.389
			0.187824	0.360251	0.348211	0.0936059	0.207503	0.511205				0.186995	0.325104	0.317638	0.534677	9.94339	9.24621	0.188704	0.353839	0.358164	0.374492	1.98358	2.33244	0.189424	0.342026	0.383937	0.757586	5.25588	9.69641	0.182588	0.321794	0.363394	2.87858	10.8605	3.82691
			0.175018	0.247984	0.273557	0.0100243	1.21779	4.81094				0.17508	0.283092	0.283288	0.0455174	15.5476	8.53939	0.174274	0.248994	0.297924	0.414729	1.63023	14.1473	0.171361	0.279158	0.293137	2.07965	13.9422	12.313	0.174677	0.262761	0.25499	0.184579	7.2493	2.30283
			0.151897	0.365459	0.457192	3.33146	0.959577	2.05178				0.151601	0.38418	0.451868	3.12967	4.11381	0.863497	0.153799	0.373448	0.414987	4.62499	1.20535	7.36908	0.158153	0.350254	0.45775	7.58699	5.08032	2.17637	0.147029	0.24856	0.259595	0.0196534	32.6395	42.0548
			0.172574	0.400071	0.595069	0.246336	1.02795	1.47872				0.173363	0.384113	0.607967	0.209577	3.00183	0.656862	0.171632	0.390074	0.621225	0.79102	1.49659	2.8519	0.166239	0.408527	0.59189	3.90784	3.16335	2.00503	0.183932	0.393899	0.415994	6.3192	0.530557	31.1268
			0.192558	0.350602	0.385319	0.228776	1.62376	6.2484				0.192516	0.349116	0.378149	0.250994	1.19313	7.99287	0.193338	0.347718	0.354539	0.175378	0.787923	13.7374	0.197478	0.337744	0.332766	2.32003	2.10323	19.035	0.19471	0.337327	0.374025	0.885806	2.22392	8.99637
			0.343569	0.620939	0.795901	0.165905	0.00987219	0.0124434				0.342	0.629603	0.788035	0.291513	1.38539	1.00064	0.33653	0.628141	0.809945	1.88622	1.14987	1.75186	0.342945	0.620374	0.797312	0.0159288	0.100785	0.164805	0.349501	0.617037	0.786717	1.89527	0.638091	1.1662
			0.364096	0.765853	0.619819	1.06079	0.242521	0.987317				0.364359	0.764109	0.626708	0.989455	0.0142233	0.113087	0.348819	0.77264	0.674259	5.2122	1.13091	7.7091	0.365456	0.759506	0.624703	0.691408	0.588259	0.207195	0.361039	0.755218	0.635381	1.89159	1.14944	1.4986
			0.324434	0.579628	0.715359	0.133936	0.578469	1.61352				0.323873	0.592983	0.69316	0.0392055	1.71237	1.53975	0.337182	0.572106	0.6593	4.0685	1.86853	6.34942	0.323631	0.588406	0.703272	0.113995	0.927332	0.103475	0.313013	0.630872	0.730575	3.39105	8.21131	3.7748
			0.276199	0.570245	0.440788	0.0721867	0.13215	1.79872				0.276655	0.560054	0.470102	0.237154	1.91707	8.56859	0.278073	0.565464	0.431047	0.751266	0.969542	0.451051	0.274154	0.572973	0.448166	0.66892	0.345531	3.50263	0.280181	0.530076	0.5179	1.51489	7.16699	19.6074
			0.364064	0.966532	1.71159	0.256555	0.460112	0.662172				0.364317	0.950691	1.71448	0.187188	2.09158	0.494354	0.367877	0.958893	1.67922	0.788252	1.24687	2.54076	0.367989	0.968357	1.71674	0.818838	0.272156	0.363356	0.367986	0.957854	1.64912	0.818018	1.35385	4.28783
			0.242707	0.383351	0.38586	30.2567	36.2144	37.3603				0.364567	0.876341	0.339365	4.76077	45.8138	44.9082	0.363575	0.965586	0.617624	4.47567	60.6633	0.263673	0.201113	0.329241	0.322355	42.2088	45.2178	47.6697	0.357353	0.748328	0.731247	2.68768	24.5139	18.709
			0.205274	0.48948	0.597954	35.2447	23.8756	14.2103				0.360344	0.711704	0.810727	13.6733	10.6849	16.3167	0.367455	0.969149	1.20952	15.9164	50.723	73.5326	0.367838	0.963132	1.48744	16.0371	49.7873	113.405	0.362385	0.838647	1.16201	14.317	30.4273	66.7154
			0.287389	0.912547	1.62511	36.6984	12.7993	93.6959				0.340515	0.658547	1.46228	24.9966	18.5974	74.2879	0.367848	0.958099	1.67022	18.9761	18.4301	99.0729	0.366551	0.815073	0.725514	19.2619	0.75068	13.5264	0.367196	0.913774	1.36657	19.1199	12.951	62.8806
			0.365295	0.969485	1.71976	10.0258	66.5782	199.609				0.360312	0.966939	1.72269	11.2533	66.1407	200.119	0.3679	0.960797	1.68472	9.38429	65.0853	193.505	0.367995	0.969633	1.71534	9.36077	66.6037	198.839	0.367247	0.920229	1.44524	9.54514	58.1149	151.784
						7.37698	9.19767	23.8978							3.87042	11.801	24.6633				4.66839	13.3852	27.6832				6.75147	12.5405	26.8121				5.0262	14.0445	29.1408
				2			误差
			0.16325	0.309131	0.348266	11.2772	13.6511	37.1126						3	7	28		RMSE
			0.168976	0.319228	0.362644	4.95382	18.2327	16.982					2	7.20778	16.9341	37.8125	20.6515	1.67886
			0.178107	0.333124	0.382444	5.26203	7.72175	9.26963					3	5.0262	14.0445	29.1408	16.0705	1.67886
			0.170122	0.32359	0.362606	2.7877	32.0774	38.9294					4	4.59609	11.5716	29.0038	15.0572	1.67886
			0.161706	0.306133	0.343976	10.0038	17.0372	23.2197					5	6.75147	12.5405	26.8121	15.368	1.67886
			0.181604	0.348612	0.378486	4.97323	11.9667	37.3367					6	4.66839	13.3852	27.6832	15.2456	1.67886
			0.19176	0.351185	0.408186	0.642428	1.79267	0.684784					7	3.87042	11.801	24.6633	13.4449	1.67886
			0.346597	0.619831	0.798976	1.04868	0.188297	0.373862					8	7.37698	9.19767	23.8978	13.4908	1.67886
			0.35347	0.760717	0.711569	3.94848	0.429699	13.6692					9	8.61874	9.57202	15.3126	11.1678	1.67886
			0.32179	0.621782	0.574347	0.682063	6.6521	18.4166					10	5.59476	7.98622	23.7456	12.4422	1.67886
			0.281703	0.521702	0.502423	2.06644	8.63362	16.0331					11	3.95578	8.21031	19.5974	10.5878	1.67886
			0.367999	0.969992	1.66496	0.821711	0.103851	3.36837					12	2.95226	8.8449	23.5146	11.7706	1.67886
			0.269724	0.500451	0.484281	22.4931	16.7303	21.383						2.95226	7.98622	15.3126	10.5878	1.67886
			0.367912	0.95926	1.35657	16.0607	49.1851	94.6298						5.5108	11.2807	25.5622
			0.367998	0.969883	1.61124	18.9432	19.8867	92.0434
			0.367998	0.969938	1.61609	9.36003	66.6561	181.549
						7.20778	16.9341	37.8125
